# Supplementary material for: rtfA controls development, secondary metabolism, and virulence in Aspergillus fumigatus
Source: PubMed Central journal article supplement (PMC5409149; doi:10.1371/journal.pone.0176702), 2017-04-28

# 6-Azauracil concentration ( $\mu\text{g/mL}$ )

A

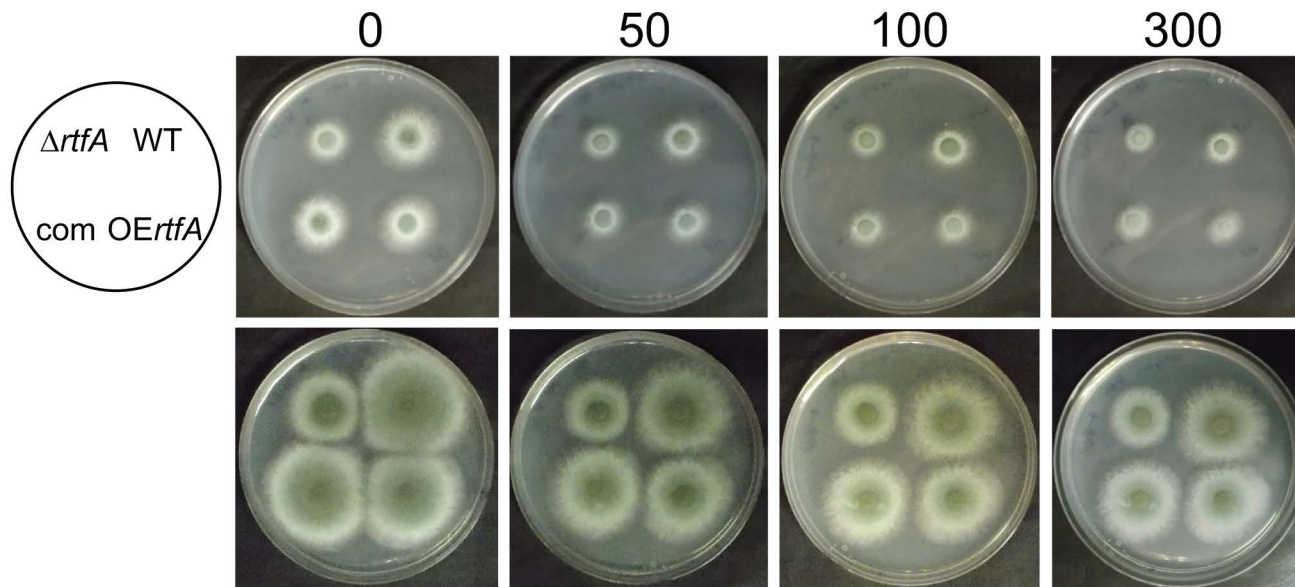

B

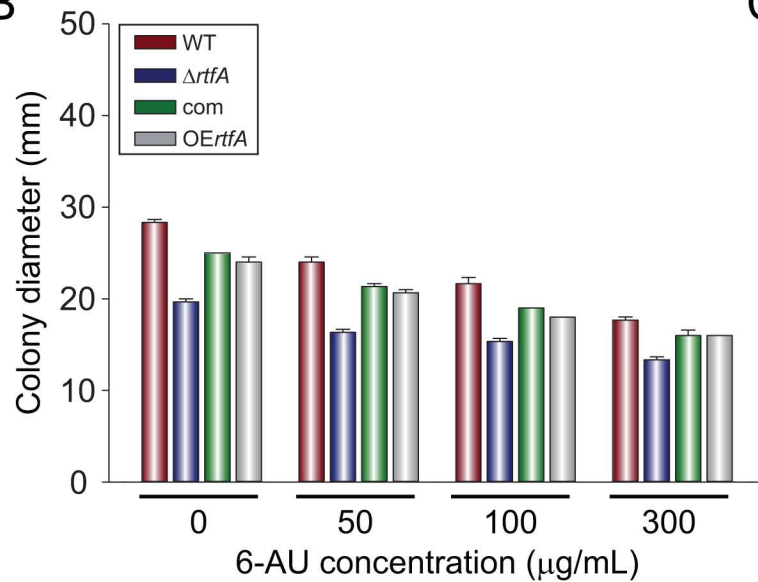

C

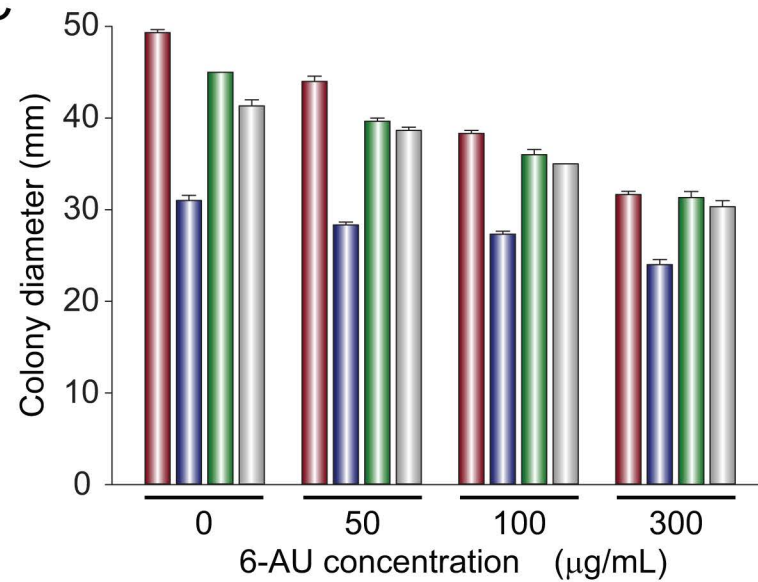

Supplement: pone.0176702.s004.pdf [file pone.0176702.s004.pdf]
