# Supplementary material for: rtfA controls development, secondary metabolism, and virulence in Aspergillus fumigatus
Source: PubMed Central journal article supplement (PMC5409149; doi:10.1371/journal.pone.0176702), 2017-04-28

**A**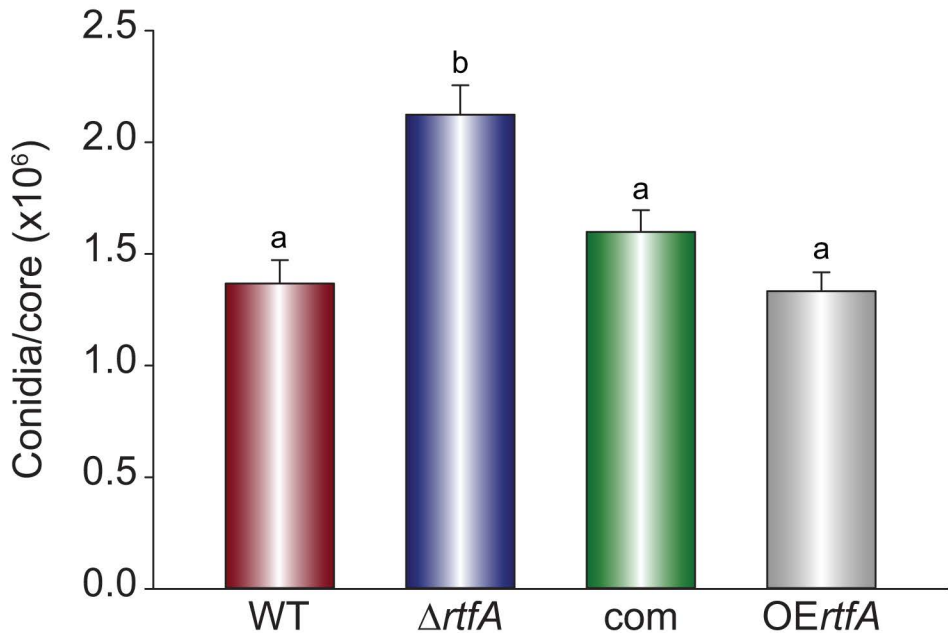**B**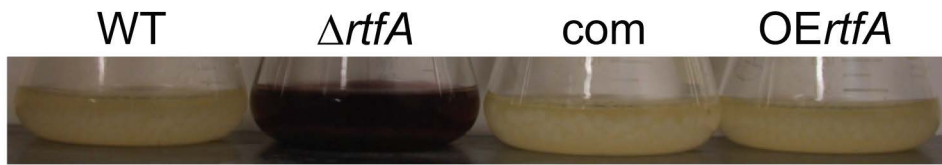

Supplement: pone.0176702.s005.pdf [file pone.0176702.s005.pdf]
